# Supplementary material for: Hemophagocytic lymphohistiocytosis in adults: An under recognized entity
Source: PubMed Central journal article supplement — BBA Clin. 2016 Dec 20;7:36–40. doi: 10.1016/j.bbacli.2016.12.002 (PMC5219626; doi:10.1016/j.bbacli.2016.12.002), 2016-12-20
Supplement: mmc1.pdf [file mmc1.pdf]

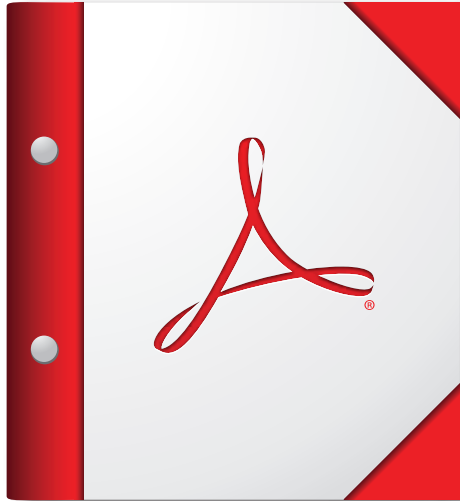

**For the best experience, open this PDF portfolio in  
Acrobat 9 or Adobe Reader 9, or later.**

[Get Adobe Reader Now!](#)
